# Supplementary material for: Does decreased visual attention to faces underlie difficulties interpreting eye gaze cues in autism?
Source: PubMed Central journal article supplement (PMC7374971; doi:10.1186/s13229-020-00361-2), 2020-07-21
Supplement: 13229_2020_361_MOESM2_ESM.pdf [file 13229_2020_361_MOESM2_ESM.pdf]

## Gaze Following Task

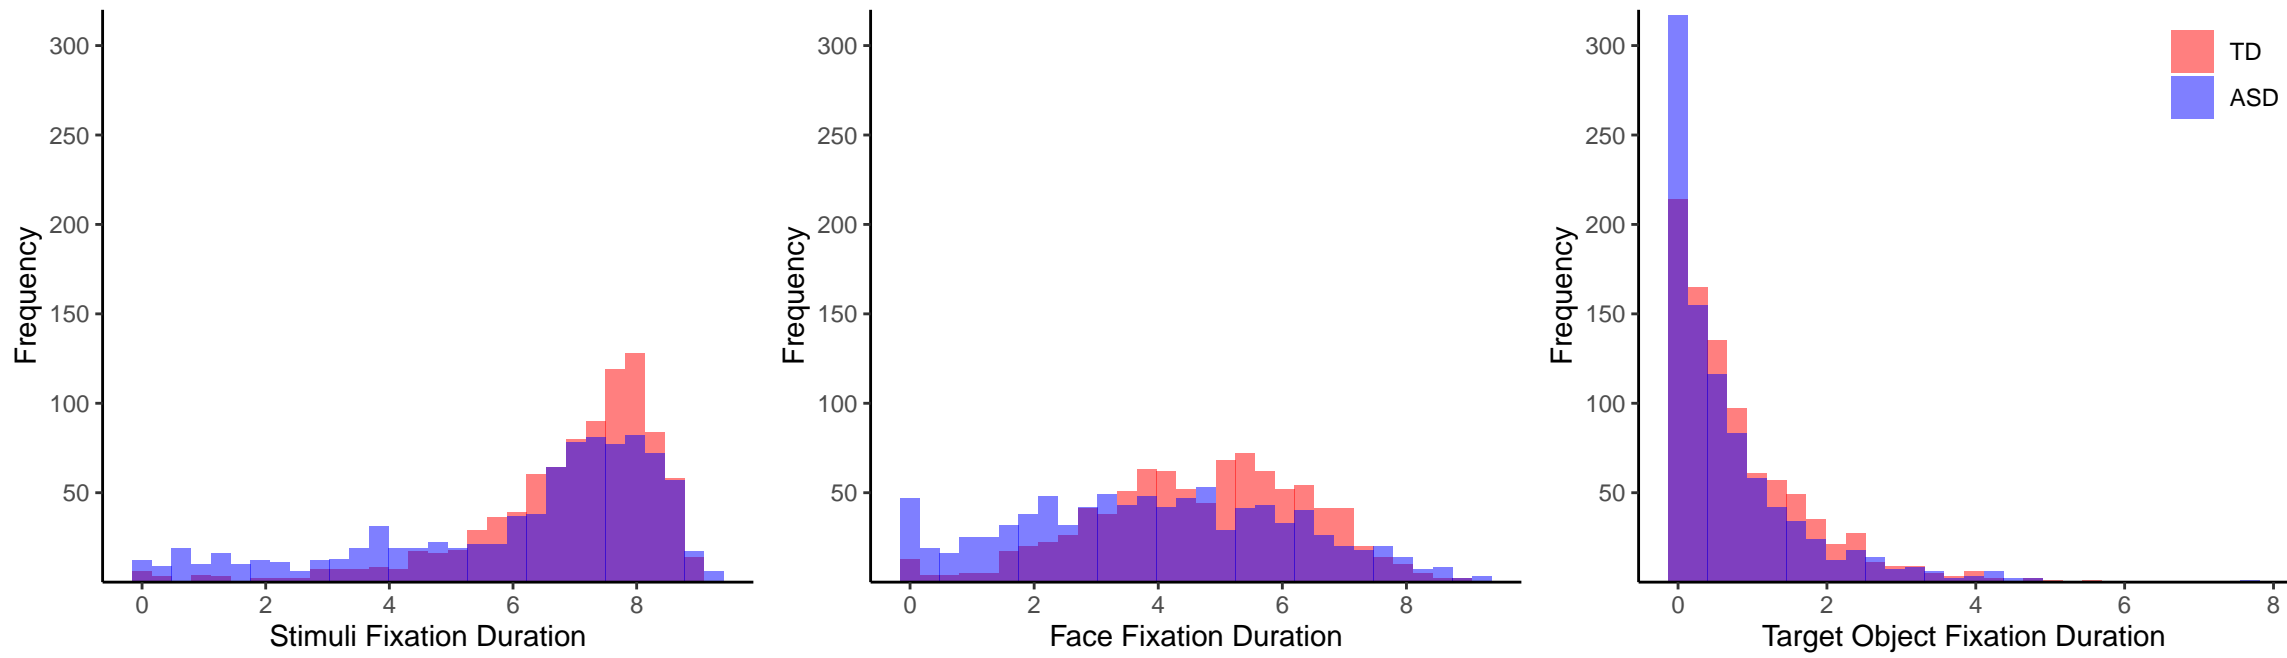

## Gaze Perception Task

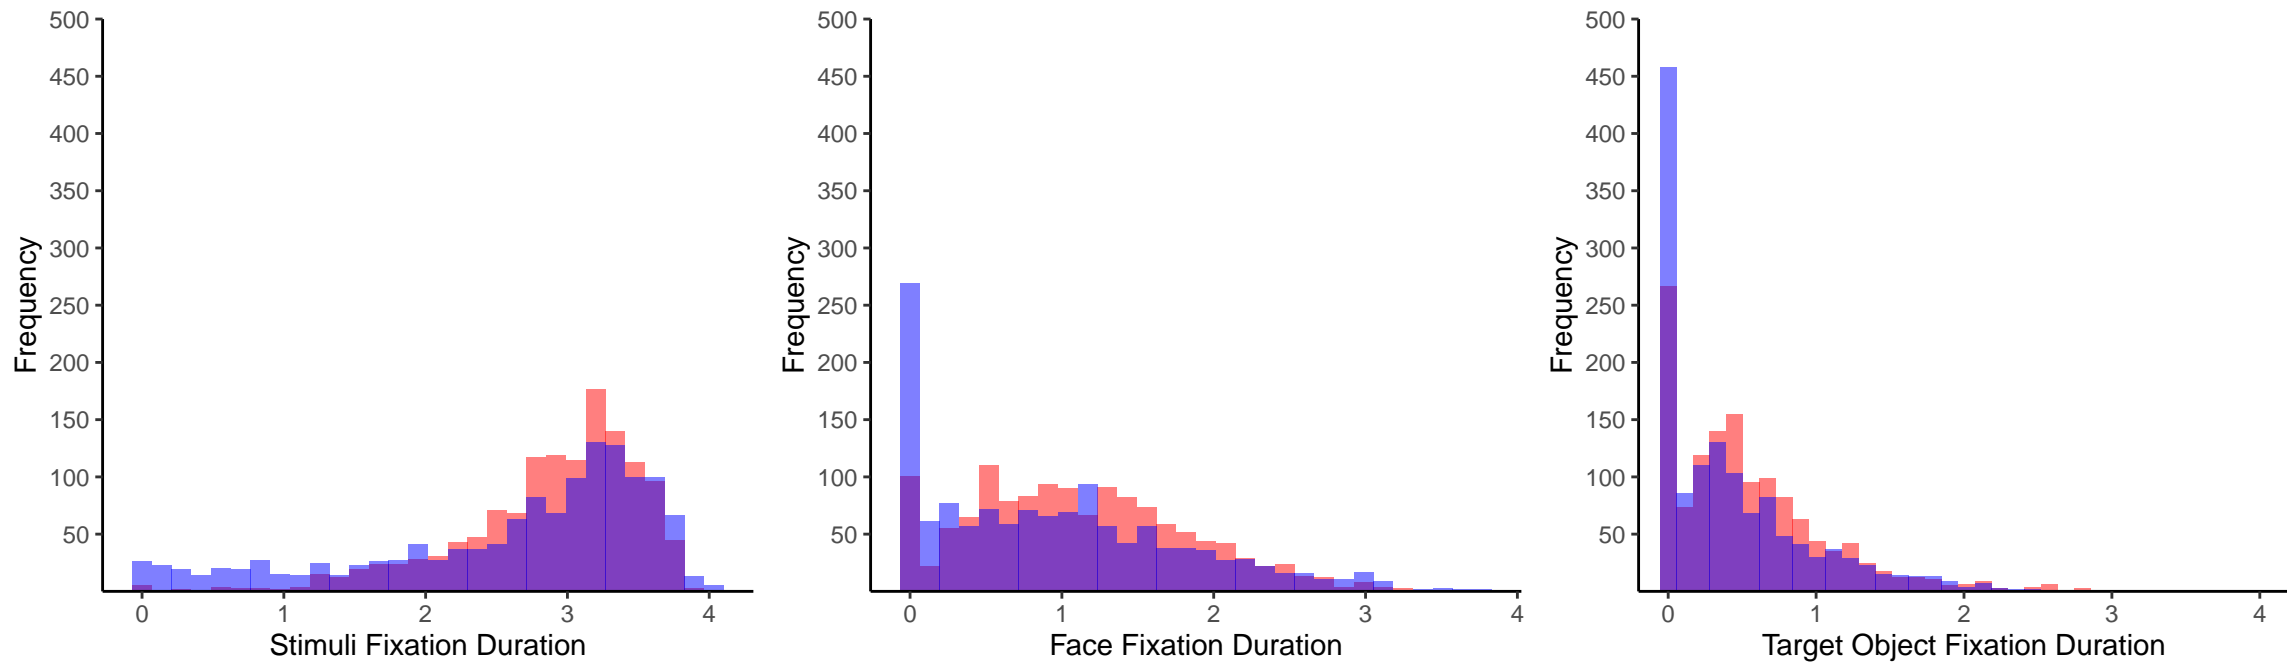

Supplementary Figure 1. Distribution of visual attention to stimulus items, faces, and target objects in ASD and TD groups. Fixation Duration is in seconds.
